# Supplementary material
Source: PubMed Central journal article supplement (PMC8374738)
Supplement: jamapsychiatry-e212236-s003.pdf [file jamapsychiatry-e212236-s003.pdf]

## Data Sharing Statement

Blumenthal. Effect of Exercise, Escitalopram, or Placebo on Anxiety in Patients With Coronary Heart Disease. *JAMA Psychiatry*. Published August 18, 2021. doi:10.1001/jamapsychiatry.2021.2236

### Data

**Data available:** Yes

**Data types:** Deidentified participant data

**How to access data:** [Patrick.j.smith@duke.edu](mailto:Patrick.j.smith@duke.edu)

**When available:** beginning date: 01-01-2025

### Supporting Documents

**Document types:** Informed consent form

**How to access documents:** [patrick.j.smith@duke.edu](mailto:patrick.j.smith@duke.edu)

**When available:** beginning date: 01-01-2025

### Additional Information

**Who can access the data:** Researchers whose proposed use of the data has been approved.

**Types of analyses:** For any acceptable specified purpose

**Mechanisms of data availability:** with investigator support after approval of a proposal
